# Supplementary material for: A Computational Understanding of Inter-Individual Variability in CYP2D6 Activity to Investigate the Impact of Missense Mutations on Ochratoxin A Metabolism
Source: MDPI journal article supplement (doi:10.3390/toxins14030207), 2022-03-14
Supplement: s1 [file s1]

# Supplementary Materials: A Computational Understanding of Inter-Individual Variability in CYP2D6 Activity to Investigate the Impact of Missense Mutations on Ochratoxin A Metabolism

Jean Lou C. M. Dorne, Martina Cirlini, Jochem Louisse, Lorenzo Pedroni, Gianni Galaverna and Luca Dellafiora

## CYP2D6\*14A

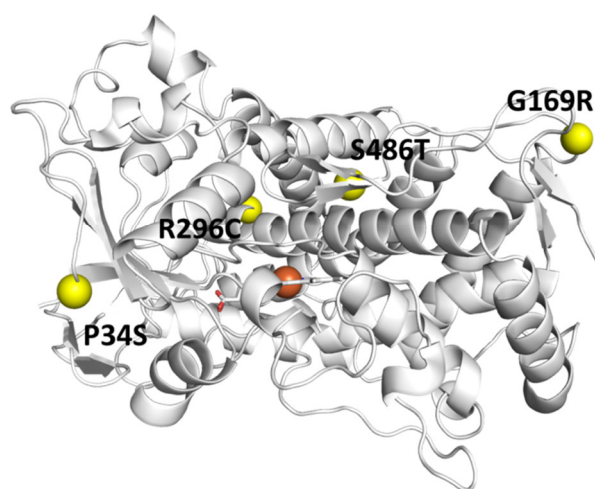

## CYP2D6\*51

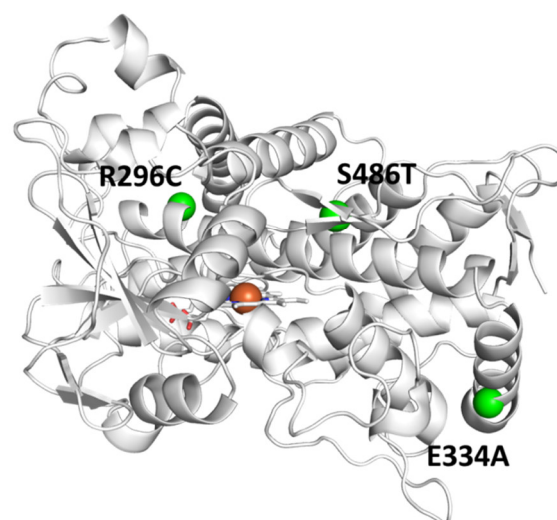

**Figure S1.** Distribution of mutations on CYP2D6\*14A and CYP2D6\*51 compared to CYP2D6\*1, as per PharmVar Database (<https://www.pharmvar.org>, accessed on 4 October 2021). The red sphere indicates the Fe-heme and identifies the position of substrate binding site. Mutated positions are represented in yellow and green spheres on CYP2D6\*14A or CYP2D6\*51 structure, respectively.

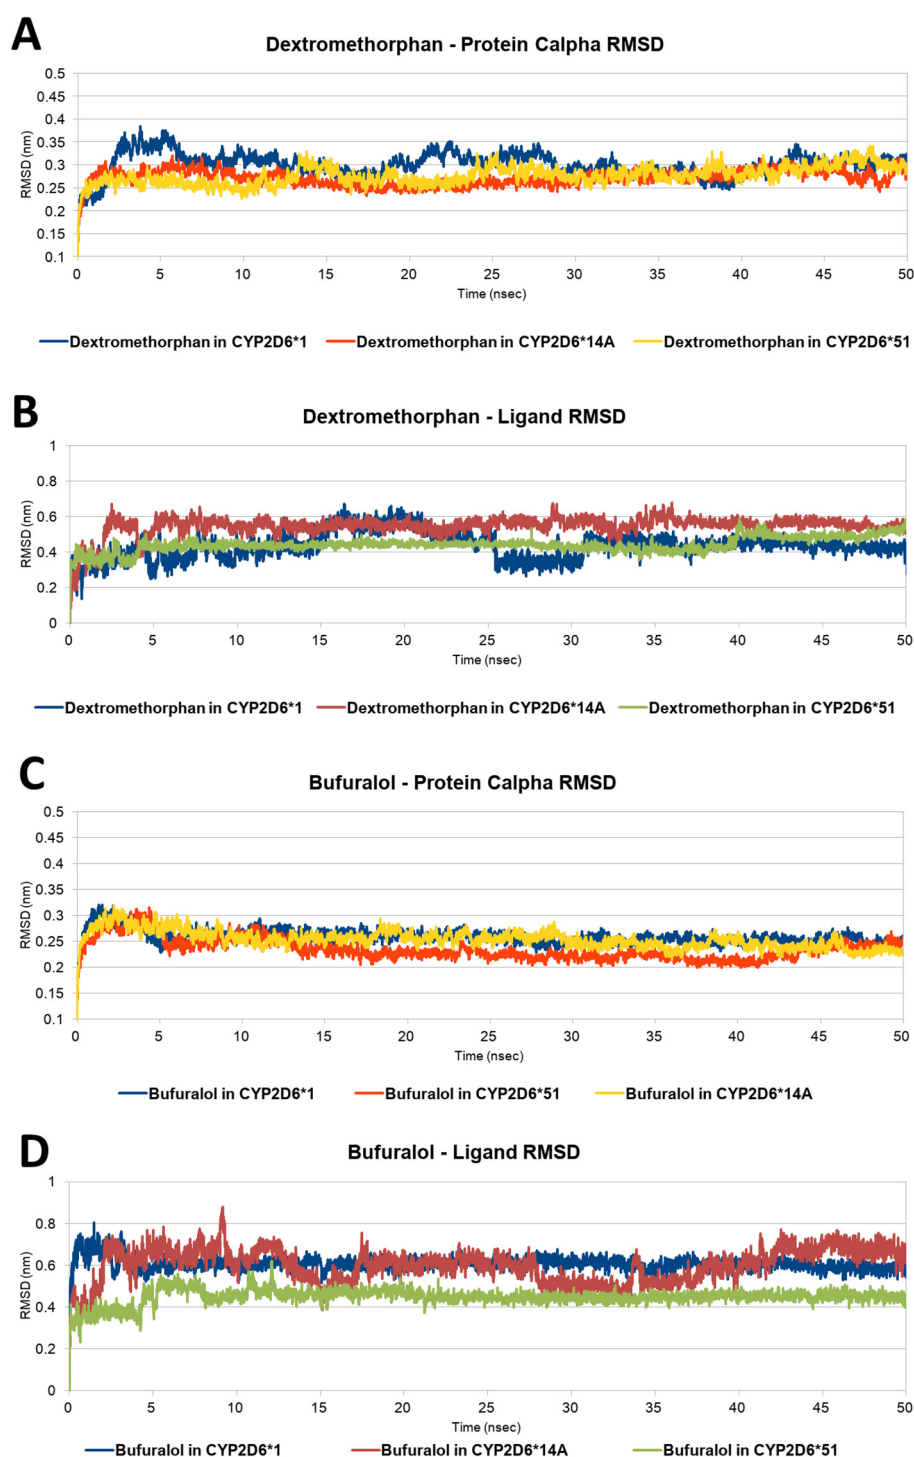

**Figure S2.** Results of molecular dynamic simulation of dextromethorphan and bufuralol within CYP2D6\*1, CYP2D6\*14A and CYP2D6\*51. (A) Protein C-alpha RMSD of dextromethorphan within CYP2D6\*1, CYP2D6\*14A or CYP2D6\*51. (B) Ligand RMSD of dextromethorphan within CYP2D6\*1, CYP2D6\*14A or CYP2D6\*51. (C) Protein C-alpha RMSD of bufuralol within CYP2D6\*1, CYP2D6\*14A or CYP2D6\*51. (D) Ligand RMSD of bufuralol within CYP2D6\*1, CYP2D6\*14A or CYP2D6\*51.

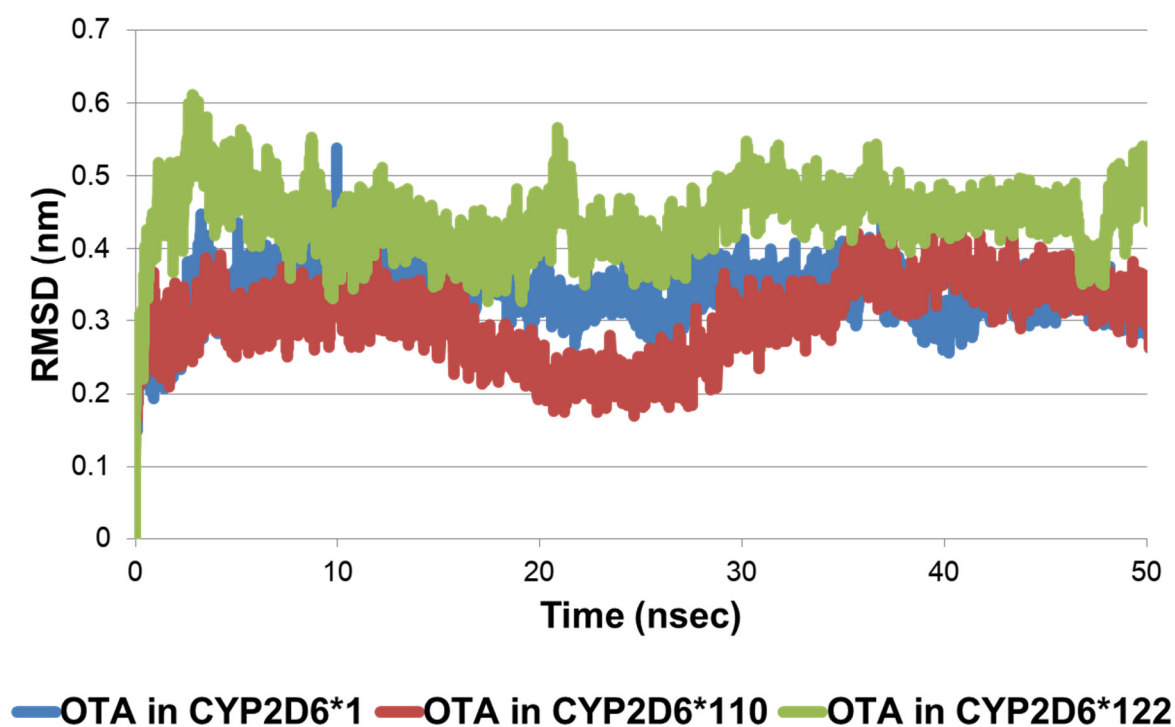

**Figure S3.** RMSD analysis of OTA in complex with CYP2D6\*1, CYP2D6\*122 or CYP2D6\*110.

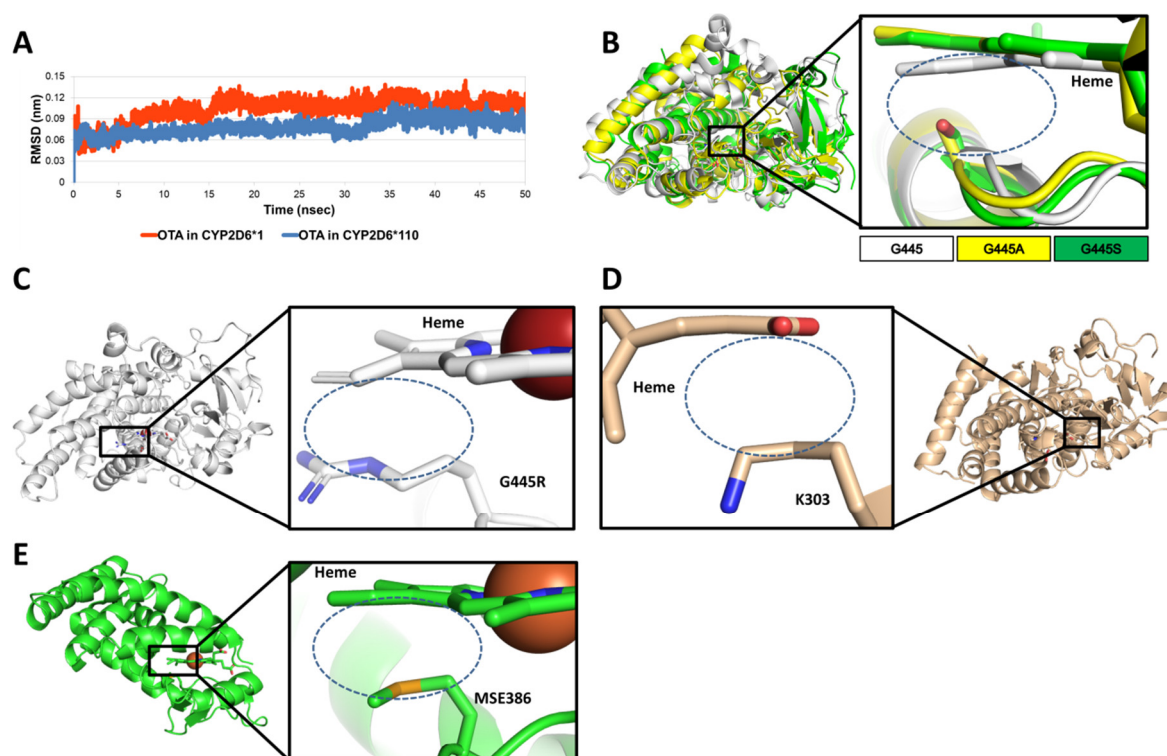

**Figure S4.** Analysis of CYP2D6\*110 in comparison to other CYPs. Proteins are represented in cartoon while heme group and amino acid side chains are represented in sticks. Dashed rings indicate the region likely interested by cation- $\pi$  or hydrophobic/hydrophobic contributions to the heme binding. Fe ion is represented by sphere. (A) RMSD plot of heme group in OTA-CYP2D6\*1 or OTA-CYP2D6\*110 complex. (B) CYP2D6\*1 (shown in white; PDB code 4WNW chain A) overlapped to two homologs with Ala (shown in yellow) or Ser (shown in green) substitution at the position 445 (PDB code 1CL6 chain A and 3DBG chain A, respectively). (C) Detail of G445R mutation in CYP2D6\*110. (D) Detail of Lys-heme interaction in an CYP homolog to CYP2D6\*1 (PDB code 5LI6). (E) Detail of MSE (selenomethionine)-heme interaction in the structure having PDB code 3CQV.

**Table S1.** List of UniProt sequences from MSA with substitutions at the position 445 of CYP2D6.

| Uniprot Entry ID | Substitution | Uniprot Entry ID | Substitution |
|------------------|--------------|------------------|--------------|
| Q01741           | 445G > A     | I3PLR0           | 445G > A     |
| A0A1D6HSP4       | 445G > A     | Q9CA60           | 445G > A     |
| A0A1D6F9Y9       | 445G > A     | Q9CA61           | 445G > A     |
| O65787           | 445G > A     | Q5KTN3           | 445G > L     |
| Q9LVD2           | 445G > A     | A0A0C6DUU3       | 445G > A     |
| Q9LIP3           | 445G > A     | Q0UK49           | 445G > A     |
| Q9LIP4           | 445G > A     | C9K202           | 445G > A     |
| Q9LIP6           | 445G > A     | Q9V979           | 445G > A     |
| Q9LIP5           | 445G > A     | Q9VCW1           | 445G > A     |
| O65782           | 445G > A     | Q9W223           | 445G > A     |
| A0A068Q721       | 445G > A     | Q964Q7           | 445G > A     |
| Q9STK8           | 445G > A     | Q27698           | 445G > A     |
| Q9STK7           | 445G > A     | Q54E98           | 445G > S     |
| Q9STK9           | 445G > A     | D1MX85           | 445G > A     |
| Q9STL1           | 445G > A     | O00061           | 445G > A     |
| Q9STL2           | 445G > A     | A0A411KZY9       | 445G > A     |
| A0A084R1J2       | 445G > S     | Q9V4T3           | 445G > A     |
| A0A068Q7V0       | 445G > A     | B6HJU5           | 445G > A     |
| Q501D8           | 445G > A     | K4CF70           | 445G > A     |
| O81345           | 445G > A     | B3LF83           | 445G > A     |
| O81346           | 445G > A     | Q9ZSY9           | 445G > A     |
| Q43135           | 445G > A     | A0A0N9HKQ7       | 445G > A     |
| Q9M7B7           | 445G > A     | B8N8R3           | 445G > A     |
| Q9M7B8           | 445G > A     | A2QK67           | 445G > A     |
| Q5E980           | 445G > E     | A0A1Y1C7S2       | 445G > Y     |
| Q6UW02           | 445G > E     | B8NM64           | 445G > A     |
| Q8BKE6           | 445G > E     | Q9K498           | 445G > S     |
| Q6P7D4           | 445G > E     | A0A0C1E1L9       | 445G > A     |
| Q9T093           | 445G > A     | B8NJH2           | 445G > A     |
| Q9NGX9           | 445G > A     | Q5ATG9           | 445G > A     |
| Q12599           | 445G > A     | P0DO32           | 445G > A     |
| Q00616           | 445G > A     | A0A482NAF7       | 445G > A     |
| P23295           | 445G > A     | A0JJT8           | 445G > A     |
| Q9ZGH8           | 445G > V     | A0A167LUS5       | 445G > A     |
| Q9L4U5           | 445G > F     | A0A1V1FNZ5       | 445G > A     |
| P9WPL6           | 445G > A     | Q9VS78           | 445G > A     |
| P9WPL7           | 445G > A     | B8NR71           | 445G > A     |
| P58047           | 445G > D     | Q1ZXG3           | 445G > F     |
| Q9FH67           | 445G > A     | Q54D38           | 445G > A     |
| A0A0N7F297       | 445G > A     | Q9NYL5           | 445G > A     |

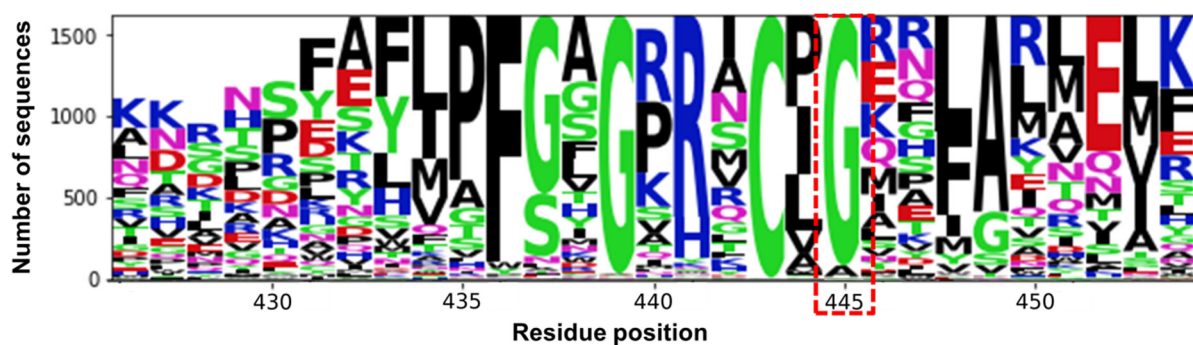

**Figure S5.** Multiple sequence alignment (MSA) logo. Only the region close to the 445 position is shown (residues 425–455). The character size is proportional to the amino acid occurrence in the MSA. The position 445 is highlighted with a red box.
